# Supplementary material for: Pediatric Inflammatory Multisystem Syndrome (PIMS) Did Occur in Poland during Months with Low COVID-19 Prevalence, Preliminary Results of a Nationwide Register
Source: PubMed Central journal article supplement (PMC7690437; doi:10.3390/jcm9113386), 2020-10-22
Supplement: jcm-09-03386-s001.pdf [file jcm-09-03386-s001.pdf]

**Table S1.** Demographic and Clinical Characteristics of the Patients, According to Age Group and SARS-CoV-2 Status.

| Characteristics                     | Overall (N = 39)         | <5 years (N = 25)        | ≥ 5 years (N = 14)       | p-Value | SARS-CoV-2 History Positive (N = 9) | SARS-CoV-2 History Unknown (N = 18) | SARS-CoV-2 History and Results Negative (N = 12) | p-Value |
|-------------------------------------|--------------------------|--------------------------|--------------------------|---------|-------------------------------------|-------------------------------------|--------------------------------------------------|---------|
|                                     | n, n/N or med (% or IQR) | n, n/N or med (% or IQR) | n, n/N or med (% or IQR) |         | n, n/N or med (% or IQR)            | n, n/N or med (% or IQR)            | n, n/N or med (% or IQR)                         |         |
| Age [years]                         | 3.1 (1.4–6.6)            | 1.8 (0.85–2.8)           | 9.15 (6.4–12.15)         | <0.01*  | 10.5 (7–13.4)                       | 3.3 (1.9–5.4)                       | 1.2 (0.5–1.6)                                    | <0.01*  |
| Male sex                            | 29 (74%)                 | 21 (84%)                 | 8 (57%)                  | 0.42    | 4 (44%)                             | 13 (72%)                            | 12 (100%)                                        | 0.047*  |
| Caucasian race                      | 39 (100%)                | 25 (100%)                | 14 (100%)                | -       | 9 (100%)                            | 1 (100%)                            | 12 (100%)                                        | -       |
| BMI [kg/m <sup>2</sup> ]            | 15.7 (14.6–17.4)         | 15.8 (14.5–17.3)         | 15.4 (14.6–19.1)         | 0.74    | 15.8 (15.3–19.1)                    | 15.6 (14.4–16.5)                    | 15.6 (14.5–18.1)                                 | 0.48    |
| Comorbidities                       |                          |                          |                          |         |                                     |                                     |                                                  |         |
| Any                                 | 6/39 (15%)               | 3/25 (12%)               | 3/14 (21%)               | 0.37    | 2/9 (22%)                           | 3/18 (17%)                          | 1/12 (8%)                                        | 0.62    |
| Acquired immunodeficiency           | 4/39 (10%)               | 3/25 (12%)               | 1/14 (7%)                | 0.54    | 1/9 (11%)                           | 2/18 (11%)                          | 1/12 (8%)                                        | 0.96    |
| Chronic heart disease               | 2/39 (5%)                | 2/25 (8%)                | 0/14                     | 0.41    | 0/9                                 | 1/18 (6%)                           | 1/12 (8%)                                        | 0.87    |
| Obesity                             | 2/36 (6%)                | 0/23                     | 2/13 (15%)               | 0.15    | 1/9 (11%)                           | 1/16 (6%)                           | 0/11                                             | 0.91    |
| Clinical features                   |                          |                          |                          |         |                                     |                                     |                                                  |         |
| Temperature [°C]                    | 39.0 (39.0–40.0)         | 39.0 (39.0–40.0)         | 39.0 (39.0–40.0)         | -       | 40.0 (39.0–40.0)                    | 39.5 (39.0–40.0)                    | 39.0 (39.0–40.0)                                 | -       |
| Length of fever [days]              | 8 (6.0–10.5)             | 8 (6.0–10.0)             | 6.5 (6.0–12.5)           | 0.76    | 6 (6.0–11.0)                        | 8 (6.0–12.25)                       | 8 (6.75–9.0)                                     | 0.61    |
| Any dermatologic                    | 37 (94%)                 | 20 (80%)                 | 13 (93%)                 | 0.39    | 7 (78%)                             | 17 (94%)                            | 11 (97%)                                         | 0.39    |
| Rash                                | 34 (87%)                 | 22 (88%)                 | 12 (86%)                 | 0.60    | 6 (67%)                             | 17 (94%)                            | 11 (97%)                                         | 0.11    |
| Hands and feet erythema or swelling | 23 (59%)                 | 13 (52%)                 | 10 (71%)                 | 0.20    | 7 (78%)                             | 11 (61%)                            | 5 (42%)                                          | 0.24    |
| Peeling                             | 17 (46%)                 | 10 (40%)                 | 6 (44%)                  | 0.87    | 3 (33%)                             | 10 (56%)                            | 4 (33%)                                          | 0.34    |
| BCG injection site erythema         | 1 (3%)                   | 1 (4%)                   | 0                        | 0.76    | 0                                   | 1 (6%)                              | 0                                                | -       |
| Any mucocutaneous                   | 30 (77%)                 | 23 (92%)                 | 10 (71%)                 | 0.11    | 5 (56%)                             | 15 (83%)                            | 10 (83%)                                         | 0.22    |
| Conjunctivitis                      | 26 (67%)                 | 17 (68%)                 | 9 (64%)                  | 0.54    | 4 (44%)                             | 13 (72%)                            | 9 (75%)                                          | 0.27    |
| Mucosal changes                     | 27 (69%)                 | 18 (72%)                 | 9 (64%)                  | 0.43    | 4 (44%)                             | 15 (83%)                            | 8 (67%)                                          | 0.12    |
| Lymphadenopathy                     | 20 (51%)                 | 15 (60%)                 | 5 (36%)                  | 0.13    | 3 (33%)                             | 9 (50%)                             | 8 (67%)                                          | 0.32    |
| Any musculoskeletal                 | 15 (39%)                 | 6 (24%)                  | 9 (64%)                  | 0.01*   | 5 (56%)                             | 6 (33%)                             | 4 (33%)                                          | 0.48    |
| Arthritis (swollen joints)          | 8 (21%)                  | 2 (8%)                   | 6 (43%)                  | 0.01*   | 4 (44%)                             | 3 (17%)                             | 1 (8%)                                           | 0.11    |
| Arthralgia (without swelling)       | 9 (23%)                  | 2 (8%)                   | 7 (50%)                  | <0.01*  | 3 (33%)                             | 5 (28%)                             | 1 (8%)                                           | 0.33    |
| Myalgia                             | 7 (18%)                  | 3 (12%)                  | 4 (29%)                  | 0.19    | 3 (33%)                             | 1 (6%)                              | 3 (25%)                                          | 0.15    |
| Any gastrointestinal                | 24 (62%)                 | 13 (52%)                 | 11 (79%)                 | 0.09    | 7 (78%)                             | 10 (56%)                            | 7 (56%)                                          | 0.52    |
| Nausea or vomiting                  | 15 (40%)                 | 6 (24%)                  | 9 (64%)                  | 0.02*   | 5 (56%)                             | 6 (33%)                             | 4 (33%)                                          | 0.48    |
| Abdominal pain                      | 16 (42%)                 | 6 (24%)                  | 10 (71%)                 | <0.01*  | 5 (56%)                             | 7 (39%)                             | 4 (33%)                                          | 0.22    |
| Diarrhea                            | 13 (33%)                 | 8 (32%)                  | 5 (36%)                  | 0.54    | 5 (56%)                             | 4 (22%)                             | 4 (33%)                                          | 0.22    |
| Any neurologic                      | 30 (77%)                 | 21 (84%)                 | 10 (71%)                 | 0.29    | 5 (56%)                             | 13 (72%)                            | 11 (92%)                                         | 0.16    |
| Neck stiffness                      | 3 (8%)                   | 2 (8%)                   | 1 (7%)                   | 0.71    | 1 (11%)                             | 0                                   | 2 (17%)                                          | 0.61    |
| Somnolence                          | 17 (44%)                 | 12 (48%)                 | 5 (36%)                  | 0.34    | 4 (44%)                             | 6 (33%)                             | 7 (58%)                                          | 0.39    |
| Headache                            | 6 (15%)                  | 0                        | 6 (43%)                  | 0.001*  | 5 (56%)                             | 1 (6%)                              | 0                                                | <0.01*  |
| Seizures                            | 1 (3%)                   | 0                        | 1 (7%)                   | -       | 1 (11%)                             | 0                                   | 0                                                | -       |
| Anosmia or aguesia                  | 1 (3%)                   | 0                        | 1 (7%)                   | -       | 1 (11%)                             | 0                                   | 0                                                | -       |
| Partial paralysis                   | 1 (3%)                   | 0                        | 1 (7%)                   | -       | 1 (11%)                             | 0                                   | 0                                                | -       |
| Cutaneous hyperalgesia              | 8 (21%)                  | 6 (24%)                  | 2 (14%)                  | 0.38    | 1 (11%)                             | 3 (17%)                             | 4 (33%)                                          | 0.39    |
| Irritability                        | 20 (51%)                 | 15 (60%)                 | 5 (36%)                  | 0.13    | 3 (33%)                             | 10 (56%)                            | 7 (58%)                                          | 0.46    |
| Photophobia                         | 1 (3%)                   | 1 (4%)                   | 0                        | -       | 0                                   | 1 (6%)                              | 0                                                | -       |
| Any respiratory                     | 16 (41%)                 | 14 (56%)                 | 4 (29%)                  | 0.09    | 4 (44%)                             | 5 (28%)                             | 7 (58%)                                          | 0.24    |

|             |         |         |         |      |         |         |         |              |
|-------------|---------|---------|---------|------|---------|---------|---------|--------------|
| Cough       | 6 (15%) | 4 (16%) | 2 (14%) | 0.63 | 2 (22%) | 2 (11%) | 2 (17%) | 0.74         |
| Chest pain  | 1 (3%)  | 0       | 1 (7%)  | -    | 1 (11%) | 0       | 0       | -            |
| Dyspnea     | 4 (10%) | 2 (8%)  | 2 (14%) | 0.45 | 2 (22%) | 0       | 2 (17%) | 0.42         |
| Coryza      | 6 (15%) | 6 (24%) | 0       | 0.05 | 0       | 1 (6%)  | 5 (42%) | <b>0.03*</b> |
| Sore throat | 8 (21%) | 7 (28%) | 1 (7%)  | 0.12 | 1 (11%) | 3 (17%) | 4 (33%) | 0.39         |

BCG: Bacillus Calmette–Guérin vaccine; BMI: body mass index; IQR: interquartile range, med: median.  
\*statistically significant ( $p < 0.05$ )

**Table S2.** Laboratory Results, According to Age Group and SARS-CoV-2 Status.

| Characteristics <sup>a</sup>              | Overall<br>(N = 39)           | < 5 years<br>(N = 25)  | ≥ 5 years<br>(N = 14)   | <i>p</i> -<br>Value | SARS-CoV-2<br>History<br>Positive<br>(N = 9) | SARS-CoV-2<br>History<br>Unknown (N =<br>18) | SARS-CoV-2<br>History and<br>Results<br>Negative (N =<br>12) | <i>p</i> -<br>Value |
|-------------------------------------------|-------------------------------|------------------------|-------------------------|---------------------|----------------------------------------------|----------------------------------------------|--------------------------------------------------------------|---------------------|
|                                           | med (IQR)                     | med (IQR)              | med (IQR)               |                     | med (IQR)                                    | med (IQR)                                    | med (IQR)                                                    |                     |
| Neutrophil count<br>[×10 <sup>9</sup> /L] | 10.8 (7.5–15.1)               | 10.1 (7.5–14.6)        | 11.1 (7.1–19.4)         | 0.51                | 13.5 (9.3–20.0)                              | 9.8 (6.4–12.6)                               | 10.8 (9.8–14.7)                                              | 0.49                |
| Hemoglobin<br>[g/dL]                      | 9.7 (8.3–10.6)                | 9.4 (8.1–10.6)         | 10.0 (9.7–10.6)         | 0.19                | 9.8 (7.8–10.6)                               | 10.2 (9.6–10.9)                              | 8.65 (7.8–9.6)                                               | 0.11                |
| Procalcitonin<br>[ng/dL]                  | 1.0 (0.3–4.0)                 | 1.1 (0.3–2.0)          | 1.0 (0.4–14.9)          | 0.64                | 9.3 (0.5–18.0)                               | 1.0 (0.4–1.9)                                | 0.8 (0.3–12.4)                                               | 0.37                |
| ESR [mm/hr]                               | 63.0<br>42.5–93.5             | 70.0<br>45.0–92.0      | 54.0<br>29.5–89.75      | 0.37                | 61.0<br>43.5–93.5                            | 44.5<br>23.0–71.0                            | 83.5<br>58.5–107.5                                           | 0.12                |
| BNP [pg/mL]                               | 295.4<br>(89.3–868.8)         | 269.0<br>(68.3–321.0)  | 568.1<br>(102.0–1764.0) | 0.18                | 768.6<br>(126.7–2054.3)                      | 321.0<br>(269.0–456.0)                       | 147.0<br>(60.0–295.7)                                        | 0.07                |
| Troponin [ng/L]                           | 4.0 (2.5–24.6)                | 3.2 (2.3–16.5)         | 11.3 (2.9–109.2)        | 0.24                | 16.6 (4.7–153.4)                             | 2.9 (2.5–11.6)                               | 3.2 (2.2–13.6)                                               | 0.19                |
| Fibrinogen<br>[mg/dL]                     | Min<br>309.5<br>(232.0–391.5) | 313.0<br>(255.5–353.5) | 304.0<br>(198.0–471.0)  | 0.81                | 198.0<br>(53.2–270.0)                        | 313.0<br>(273.0–369.0)                       | 297.0<br>(230.0–349.0)                                       | 0.63                |
|                                           | Max<br>567.0<br>(501.0–650.0) | 567.0<br>(391.0–693.0) | 588.0<br>(506.3–648.5)  | 0.91                | 596.0<br>(567.0–648.0)                       | 571.0<br>(368.5–661.5)                       | 564.0<br>(530.0–567.0)                                       | 0.71                |
| INR                                       | 1.3 (1.1–1.4)                 | 1.3 (1.1–1.3)          | 1.3 (1.2–1.5)           | 0.37                | 1.4 (1.2–1.5)                                | 1.3 (1.1–1.3)                                | 1.2 (1.1–1.2)                                                | 0.42                |
| LDH [U/L]                                 | 269.0<br>(232.0–393.0)        | 274.5<br>(244.8–443.8) | 244.0<br>(212.0–307.0)  | 0.29                | 232.0<br>(160.0–307.0)                       | 278.0<br>(244.5–694.5)                       | 263.0<br>(244.0–341.0)                                       | 0.38                |

BNP: brain natriuretic peptide; ESR: erythrocyte sedimentation rate; INR: international normalized ratio; IQR: interquartile range;  
LDH: lactate dehydrogenase; med: median.

<sup>a</sup> For neutrophil count, ESR, procalcitonin, troponin, BNP and LDH levels – highest results were obtained; for lowest results were obtained

\*statistically significant ( $p < 0.05$ )
